# Supplementary material for: Diet, Oral Hygiene Habits, and Approach to Dental Visits of Early School-Aged Children during the COVID-19 Pandemic and Possible Long-Term Health Consequences
Source: MDPI journal article supplement (doi:10.3390/jcm12175690), 2023-08-31
Supplement: s1 [file s1]

**Table S1.** Questionnaire sent to caregivers of children aged 6–10 years old.

| Question                                                                                                          |                                                                                                                                                                                                                                                                                                                                                                                                                    |                                             |
|-------------------------------------------------------------------------------------------------------------------|--------------------------------------------------------------------------------------------------------------------------------------------------------------------------------------------------------------------------------------------------------------------------------------------------------------------------------------------------------------------------------------------------------------------|---------------------------------------------|
| How old is your child?                                                                                            |                                                                                                                                                                                                                                                                                                                                                                                                                    |                                             |
| Gender of the child                                                                                               | Male; Female                                                                                                                                                                                                                                                                                                                                                                                                       |                                             |
| What is your level of education?                                                                                  |                                                                                                                                                                                                                                                                                                                                                                                                                    |                                             |
| Characteristics of your profession, interests                                                                     | Medical;                                                                                                                                                                                                                                                                                                                                                                                                           |                                             |
|                                                                                                                   | Medical related education;                                                                                                                                                                                                                                                                                                                                                                                         |                                             |
|                                                                                                                   | Not related to the medical profession, but I am interested in health;                                                                                                                                                                                                                                                                                                                                              |                                             |
|                                                                                                                   | Not related to the medical profession and I have no interest in health                                                                                                                                                                                                                                                                                                                                             |                                             |
| Where do you live?                                                                                                |                                                                                                                                                                                                                                                                                                                                                                                                                    | Urban, rural areas                          |
| The impact of the pandemic and the suspension of stationary classes on the eating habits of the child and parents |                                                                                                                                                                                                                                                                                                                                                                                                                    |                                             |
| How has the quantity and quality of meals eaten changed during the pandemic?                                      | We buy healthy products such as fresh vegetables, fruit;<br>We buy processed products such as sweets, crisps;<br>The child snacks between meals (e.g. due to constant access to the kitchen)                                                                                                                                                                                                                       | More often;<br>Less often;<br>Just as often |
| What changes have you noticed in your child's drinking habits?                                                    | The child drinks more sweetened drinks such as soda, juice, flavored water, sweetened tea;<br>The child drinks less sweetened beverages;<br>Without changes                                                                                                                                                                                                                                                        |                                             |
| Due to the pandemic, do you have more time to prepare meals at home (e.g. due to the transition to remote work)?  | I have more time to prepare meals at home;<br>I have less time to prepare meals at home;<br>I have comparably the same amount of time to prepare meals at home                                                                                                                                                                                                                                                     |                                             |
| How has the amount of fast food eaten (e.g. ordered for delivery) changed?                                        | Since the outbreak of the pandemic, we have eaten less ready-made, processed food-fast food;<br>Since the outbreak of the pandemic, we have eaten more ready-made, processed food-fast food;<br>Without changes.                                                                                                                                                                                                   |                                             |
| The impact of the suspension of stationary classes on the maintenance of oral hygiene in a child                  |                                                                                                                                                                                                                                                                                                                                                                                                                    |                                             |
| Did the child brush his teeth more/less during distance learning?                                                 | The child brushed his teeth more often;<br>The child brushed his teeth less frequently (e.g. he forgot to brush his teeth in the morning);<br>The child brushed his teeth as often as before.                                                                                                                                                                                                                      |                                             |
| Did your child brush his/her teeth more/less under your supervision?                                              | We more often supervised the correctness and length of tooth brushing by the child during remote learning;<br>Less often we supervised the correctness and duration of tooth brushing by children during distance learning;<br>We supervised the correctness and duration of tooth brushing by the child as often during remote teaching as before the pandemic;<br>The child always brushed his teeth by himself. |                                             |
| Have you noticed a change in your child's attitude to maintaining oral hygiene when they spent more time at home? | The child had less motivation to maintain hygiene;<br>The child was more motivated to maintain hygiene;<br>The child was just as motivated as before the pandemic.                                                                                                                                                                                                                                                 |                                             |
| Dental visits before and during the pandemic                                                                      |                                                                                                                                                                                                                                                                                                                                                                                                                    |                                             |
| Did your child regularly attend dental check-ups before and during the pandemic?                                  | During the pandemic, he has attended as regularly as he attended before the pandemic;                                                                                                                                                                                                                                                                                                                              |                                             |
|                                                                                                                   | They attended regularly before the outbreak of the pandemic, and less frequently during the pandemic due to fear of contagion;                                                                                                                                                                                                                                                                                     |                                             |
|                                                                                                                   | They attended regularly before the outbreak of the pandemic, and less frequently during the pandemic for other reasons;                                                                                                                                                                                                                                                                                            |                                             |

|                                                                                                                                     |                                                                                    |            |
|-------------------------------------------------------------------------------------------------------------------------------------|------------------------------------------------------------------------------------|------------|
|                                                                                                                                     | During the pandemic, he has attended as rarely as he attended before the pandemic. |            |
| Have you attended your dental check-ups during the pandemic?                                                                        | Yes;<br>No                                                                         |            |
| In what situation(s) or for what purpose were you willing to go to the dentist with your child before the outbreak of the pandemic? | Toothache;<br>Tooth trauma;<br>Caries;<br>Control visit.                           | Yes;<br>No |
| In what situation/s or for what purpose are have you been willing to go with your child to the dentist during the pandemic?         | Toothache;<br>Tooth trauma;<br>Caries;<br>Control visit.                           | Yes;<br>No |
